# Supplementary material
Source: publisher figshare collection journal article supplement (https://acs.figshare.com/ndownloader/files/4252906)
Supplement: Supplementary file 1 [file 4252906]

## Supporting Information

### Helical Silicon/Silicon Oxide Core-Shell Anodes Grown onto the Surface of Bulk Silicon

Hana Yoo, Jungin Lee, Hyunjung Kim, Jung-Pil Lee, Jaephil Cho\* and Soojin Park\*

Interdisciplinary School of Green Energy, UNIST, Ulsan 689-798, Korea

\*email: jpcho@unist.ac.kr, spark@unist.ac.kr

#### Experimental Section

*Preparation of Si/SiO<sub>x</sub> urchin-like structures:* Bulk Si powder (Sigma-Aldrich, 10-20  $\mu\text{m}$  in size) was cleaned in acetone and isopropyl alcohol and dried under nitrogen. PS-*b*-P4VP copolymer was purchased from Polymer Source, and was used without further purification ( $M_n(\text{PS}) = 35.0 \text{ kg/mol}$ ,  $M_n(\text{P4VP}) = 21.0 \text{ kg/mol}$ ,  $M_w/M_n = 1.09$ ). The PS-*b*-P4VP copolymers were dissolved in toluene at 60 °C for 1 hr and cooled to room temperature to make a 0.7 wt% polymer solution. Subsequently, chloroplatinic acid ( $\text{H}_2\text{PtCl}_6$ , Sigma-Aldrich) was loaded to the polymer solutions with a molar ratio of metal to pyridine of 0.8 and stirred for 24 hr. Next, bulk Si powder (1 g) was added to Pt-incorporated PS-*b*-P4VP solution (5 mL) with stirring for 3 hr, and subsequently, n-hexane, non-solvent for both blocks, was dropped to form bulk Si uniformly coated with micellar film. When the Si powder containing the Pt-incorporated micelles was exposed

to oxygen plasma (SPI Plasma Prep II, 50 watts) for 20 min, Pt-decorated Si particles were obtained with the removal of all polymers. In addition, high-temperature annealing (500 °C for 2 hr in an Ar) can also be used to remove polymers. The Pt-coated Si was transferred to quartz tube furnace (1050 °C for 2 hr in an Ar stream) to grow 1D Si/SiO<sub>x</sub> nanostructures onto the surface of Si particle. In order to coat the carbon layer on the urchin-like Si/SiO<sub>x</sub> electrodes, acetylene gas that used as a carbon source, was thermally decomposed at 850 °C for 30 min in quartz furnace.

*Characterization of Si/SiO<sub>x</sub> urchin-like electrodes:* Pt-incorporated PS-*b*-P4VP thin films, Pt-decorated Si, Si/SiO<sub>x</sub> urchin-like structures were characterized by SEM (NanoSEM 230, FEI) operating at 10 kV. The crystal structures of Si/SiO<sub>x</sub> sample were measured by high power X-ray diffractometer (XRD) on a Rigaku D/MAX at 2500 V using Ni-filtered Cu K $\alpha$  radiation. Raman spectra (WITEC, Alpha-300M) were obtained to determine the dimensional ratio of diordered (D) band to the graphene (G) band ( $I_D/I_G$ ) for carbon-coated electrodes. A He-Ne laser operating at  $\lambda = 632.8$  nm was used as the excitation source. For HR-TEM measurements, urchin-like Si/SiO<sub>x</sub> samples were dispersed in ethanol by ultra-sonication, and transferred onto Formvar-coated copper grids. TEM images were taken in the bright-field (or dark-field) mode using JEM 2100 (JEOL) operated at 200 kV accelerating voltages.

*Electrochemical performance:* Electrochemical experiments were performed using coin-type half cells (2016R type) by assembling in an Ar-filled glove box. Carbon-coated bulk Si and Si/SiO<sub>x</sub> urchin-like electrodes were used as the working electrodes and lithium metal foils as the counter electrodes. The electrolyte was LiPF<sub>6</sub> (1.3 M) with ethylene carbonate/diethylene carbonate (EC/DEC, 30:70 vol%, Panax starlyte, Korea). The coin-type half cells were cycled at a rate of 0.1 and 0.2 C between 0.02 and 1.2 V. The

electrode was composed of carbon-coated Si/SiO<sub>x</sub> nanostructured electrodes (70 wt%), Super P carbon black (15 wt%), and polyacrylic acid/sodium carboxymethyl cellulose (wt/wt = 50/50, 15 wt%, Sigma-Aldrich).

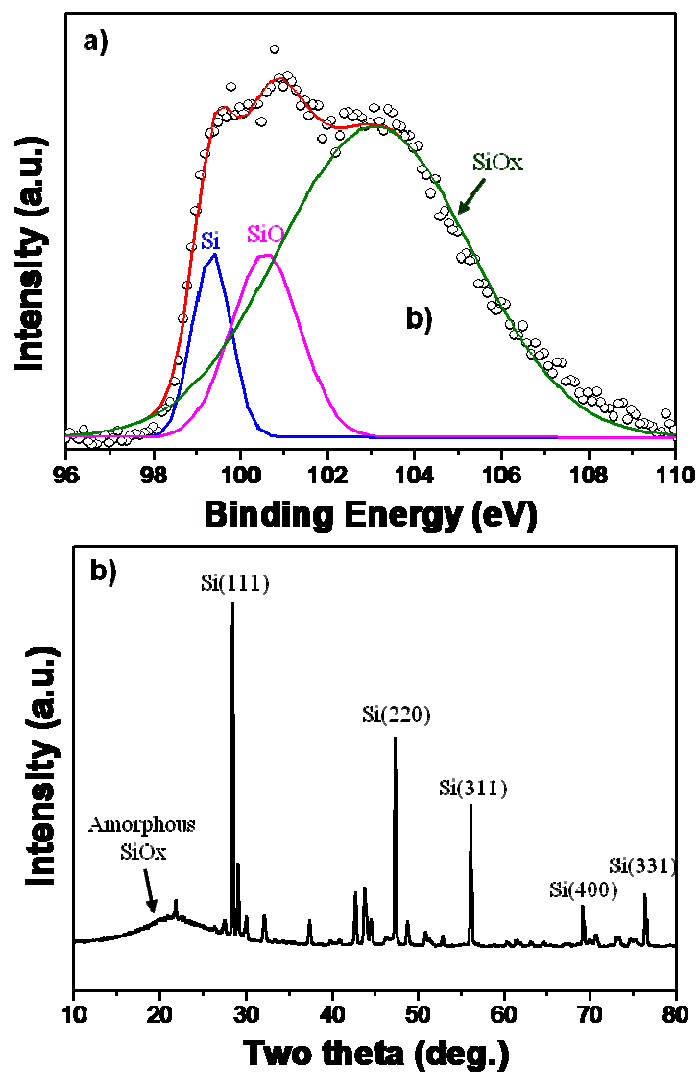

**Figure S1.** Characterization of Si/SiOx urchin-like structures consisting of Si/SiOx nanocoils grown onto the surface of bulk Si particles. a) XPS spectra confirms that Si/SiOx urchin-like structures are composed of silicon and SiOx ( $1 < x < 2$ ). b) XRD pattern indicates that Pt-Si alloy (unassigned peaks) acted as a catalyst to grow crystalline Si and amorphous SiOx onto the surface of bulk Si particles.

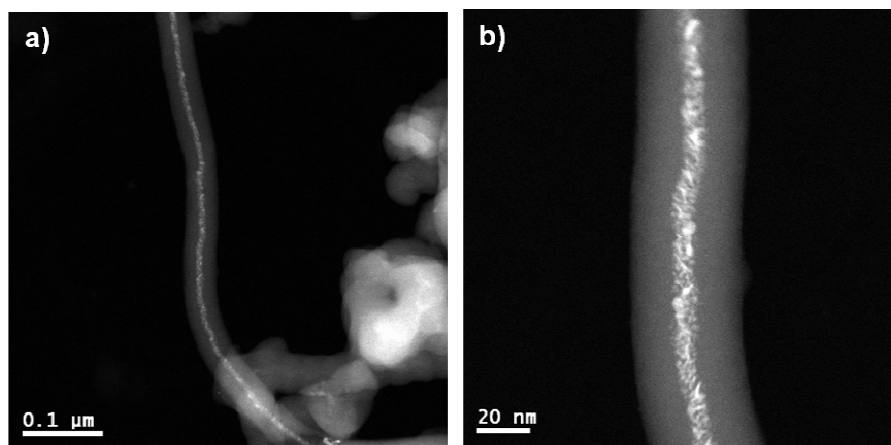

**Figure S2.** Dark-field TEM image showing a) straight nanowires consisting of crystalline Si core and amorphous SiO<sub>x</sub> shell and b) the magnified TEM image. The crystalline Si having higher electron density than amorphous SiO<sub>x</sub> was seen as brighter spots.

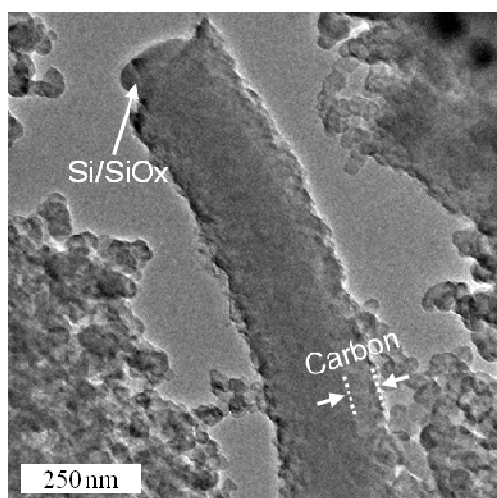

**Figure S3.** HR-TEM image of Si/SiO<sub>x</sub> 1D nanostructures. It shows that the Si/SiO<sub>x</sub> structures were not significantly changed after 70 cycles.

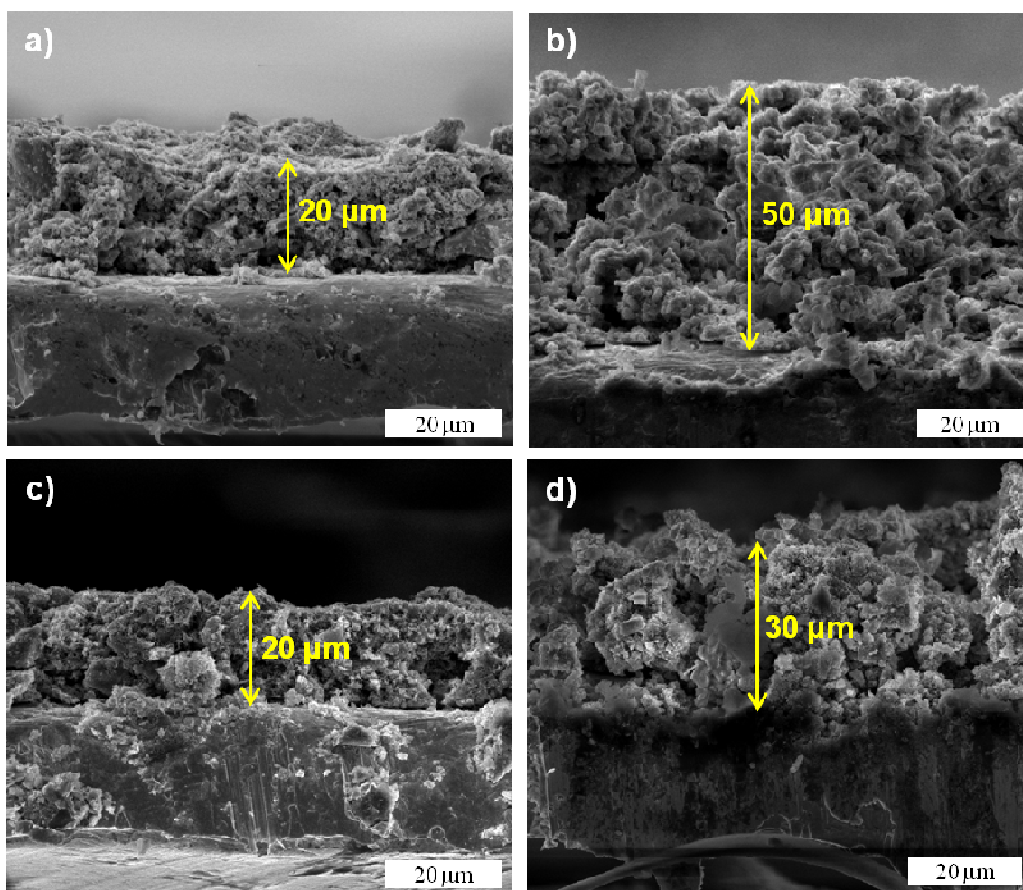

**Figure S4.** SEM images showing thickness of active layers before lithiation and after lithiation. Thickness of carbon-coated bulk Si layers a) before lithiation and b) after lithiation to 0 V. Thickness of carbon-coated Si/SiOx layers c) before lithiation and d) after lithiation to 0 V. The Si/SiOx active materials showed less volume expansion than bulk Si electrodes.
